# Supplementary material for: Modulation of (Homo)Glutathione Metabolism and H2O2 Accumulation during Soybean Cyst Nematode Infections in Susceptible and Resistant Soybean Cultivars
Source: PubMed Central journal article supplement (PMC7013558; doi:10.3390/ijms21020388), 2020-01-08
Supplement: ijms-21-00388-s001.pdf [file ijms-21-00388-s001.pdf]

**Table S1.** PCR primers used for qRT-PCR assays.

| Gene name      | Forward primer (5'-3') | Reverse primer (5'-3') |
|----------------|------------------------|------------------------|
| <i>γ-ECS</i>   | TGAAGACACCATTCGAGAC    | ACACCTGTTCTAACCACCTC   |
| <i>GSHS</i>    | CTTATGAAGGTGGAGTTTTGCC | GCCTCTTTTCTTCTTTCACTGG |
| <i>hGSHS</i>   | ACCTTTGACCACCAACTCTG   | CACCCTTGCTTCCAATGACT   |
| <i>Actin11</i> | CGGTGGTTCTATCTTGGCATC  | CGGTGGTTCTATCTTGGCATC  |

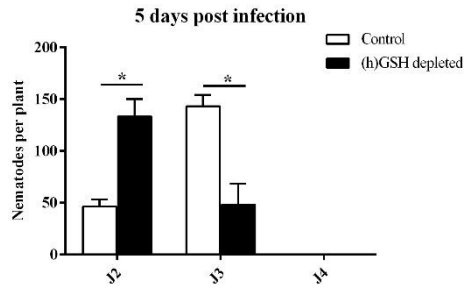

**Figure S1.** Number of nematodes inside the roots of the (h)GSH-depleted and control plants at 5 d post-inoculation (dpi). Data (nematodes from 15 plants produced in three different biological experiments) are represented by mean  $\pm$  standard error. \* indicates a statistically significant difference ( $P < 0.05$ ).
